# Supplementary material
Source: publisher site journal article supplement (https://www.dovepress.com/article/275304)
Supplement: Supplementary file 1 [file get_supplementary_file.php]

Table S1. Compare the AUROCs value of different models in the deriving cohort and validation cohort

| Variable | AUC | SE | 95% CI |
| --- | --- | --- | --- |
| Deriving cohort | |  |  |
| AFP | 0.625 | 0.0163 | 0.588 - 0.661 |
| BCLC | 0.643 | 0.0176 | 0.606 - 0.678 |
| PVTT | 0.606 | 0.0148 | 0.569 - 0.643 |
| TSH | 0.607 | 0.0156 | 0.570 - 0.643 |
| MELD | 0.600 | 0.0221 | 0.563 - 0.637 |
| Child-Pugh | 0.635 | 0.0212 | 0.598 - 0.671 |
| TNM | 0.610 | 0.0215 | 0.572 - 0.646 |
| Okuda | 0.631 | 0.0207 | 0.594 - 0.667 |
| CLIP | 0.714 | 0.0193 | 0.679 - 0.747 |
| Progression model | 0.755 | 0.0184 | 0.721 - 0.787 |
|  |  |  |  |
| Validation cohort | |  |  |
| AFP | 0.602 | 0.0251 | 0.544 - 0.657 |
| BCLC | 0.669 | 0.0234 | 0.613 - 0.721 |
| PVTT | 0.640 | 0.0225 | 0.584 - 0.694 |
| TSH | 0.614 | 0.0202 | 0.557 - 0.669 |
| MELD | 0.613 | 0.0322 | 0.556 - 0.668 |
| Child-Pugh | 0.650 | 0.0299 | 0.593 - 0.703 |
| TNM | 0.735 | 0.0280 | 0.682 - 0.784 |
| Okuda | 0.625 | 0.0290 | 0.568 - 0.679 |
| CLIP | 0.735 | 0.0277 | 0.681 - 0.783 |
| Progression model | 0.753 | 0.0262 | 0.701 - 0.800 |
|  | | | | |

Table S2. Point assignment from nomogram for predicting tumor progression

|  | tumor parameters | | | points | | | |  | thyroid function parameters | | | | | | | | points | | | | | |
| --- | --- | --- | --- | --- | --- | --- | --- | --- | --- | --- | --- | --- | --- | --- | --- | --- | --- | --- | --- | --- | --- | --- |
|  | | |  | | |  |  | | | | |  | | | |  | | | | |
|  | | |  | | |  |  | | | | |  | | | |  | | | | |  | | |
| BCLC | | 0-B | | | 0 | TSH(uIU/ml) | | | | | | | ≤ 5 | | | | | 0 | | | |
|  | | C-D | | | 8 |  | | | | | | | ＞5 | | | | | 10 | | | |
| AFP(ng/mL) | | ≤400 | | | 0 |  | | | | |  | | | |  | | | |
|  | | ＞400 | | | 10 |  | | | | |  | | | |  | | | | |
| PVTT | | No | | | 0 |  | | | | |  | | | |  | | | | |
|  | | Yes | | | 5 |  | | | | |  | | | |  | | | | |
|  | | |  | | |  | | | |  | | | |  | | |  | | | | | | | |
|  | | |  | | |  | | | |  | | | |  | | |  | | | | | | | |

Table S3.Characteristics of patients with hepatocellular carcinoma according to outcome in prospective cohort

| Variables |  | All cohort | Progression | No progression | P value |
| --- | --- | --- | --- | --- | --- |
|  | n=77(%) | n=13(%) | n=64(%) |  |
| Age(＞50y) |  | 60(77.9) | 13(100.0) | 47(73.4) | 0.03 |
| Gender(male) |  | 71(92.2) | 11(84.6) | 60(93.8) | 0.26 |
| Smoking |  | 2(2.6) | 0(0.0) | 2(3.1) | 0.52 |
| Alcohol |  | 2(2.6) | 1(7.7) | 1(1.6) | 0.21 |
| Cirrhosis |  | 73(94.8) | 13(100.0) | 60(93.8) | 0.36 |
| PVTT at baseline | | 26(33.8) | 8(61.5) | 18(28.1) | 0.02 |
| Hypertension |  | 16(20.8) | 5(38.5) | 11(17.2) | 0.09 |
| Diabetes |  | 24(31.2) | 1(7.7) | 23(35.9) | 0.05 |
| Coronary disease | | 9(11.7) | 1(7.7) | 8(12.5) | 0.62 |
| Child‐Pugh(A+B) | | 71(92.2) | 13(100.0) | 58(90.6) | 0.25 |
| BCLC | 0-B | 62(80.5) | 7(53.8) | 55(85.9) | 0.008 |
|  | C-D | 15(19.5) | 6(46.2) | 9(14.1) |  |
| Tumor multiplicity | Solitary | 38(49.4) | 7(53.8) | 31(48.4) | 0.72 |
|  | multiple | 39(50.6) | 6(46.2) | 33(51.6) |  |
| Tumor size(≤5cm) | | 59(76.6) | 11(84.6) | 48(75.0) | 0.46 |
| WBC(109/L) | ≤4 | 33(42.9) | 4(30.8) | 29(45.3) | 0.33 |
|  | ＞4 | 44(57.1) | 9(69.2) | 35(54.7) |  |
| HGB(g/L) | ≤120 | 26(33.8) | 4(30.8) | 22(34.4) | 0.80 |
|  | ＞120 | 51(66.2) | 9(69.2) | 42(65.6) |  |
| PLT(109/L) | ≤100 | 43(55.8) | 5(38.5) | 38(59.4） | 0.17 |
|  | ＞100 | 34(44.2) | 8(61.5) | 26(40.6） |  |
| BUN(μmol/L) | ≤9.5 | 71(92.2) | 11(84.6) | 60(93.8) | 0.26 |
|  | ＞9.5 | 6(7.8) | 2(15.4) | 4(6.2) |  |
| CR(μmol/L) | ≤111 | 73(94.8) | 11(84.6) | 62(96.9) | 0.06 |
|  | ＞111 | 4(5.2) | 2(15.4) | 2(3.1) |  |
| ALT(IU/L) | ≤50 | 69(89.6) | 13(100.0) | 56(87.5) | 0.18 |
|  | ＞50 | 8(10.4) | 0(0.0) | 8(12.5) |  |
| TBIL(umol/L) | ≤18.8 | 38(49.4) | 9(69.2) | 29(45.3) | 0.12 |
|  | ＞18.8 | 39(50.6) | 4(30.8) | 35(54.7) |  |
| r-GGT(IU/L) | ≤60 | 42(54.5) | 9(69.2) | 33(51.6) | 0.24 |
|  | ＞60 | 35(45.5) | 4(30.8) | 31(48.4) |  |
| PTA(%) | ≤70 | 25(32.5) | 2(15.4) | 23(35.9) | 0.15 |
|  | ＞70 | 52(67.5) | 11(84.6) | 41(64.1) |  |
| AFP(ng/mL) | ≤400 | 60(77.9） | 11(84.6) | 49(76.6) | 0.52 |
|  | ＞400 | 17(22.1) | 2(15.4) | 15(23.4) |  |
| TSH(uIU/ml) | ≤5 | 61(79.2) | 6(46.2) | 55(85.9) | 0.001 |
|  | ＞5 | 16(20.8) | 7(53.8) | 9(14.1) |  |


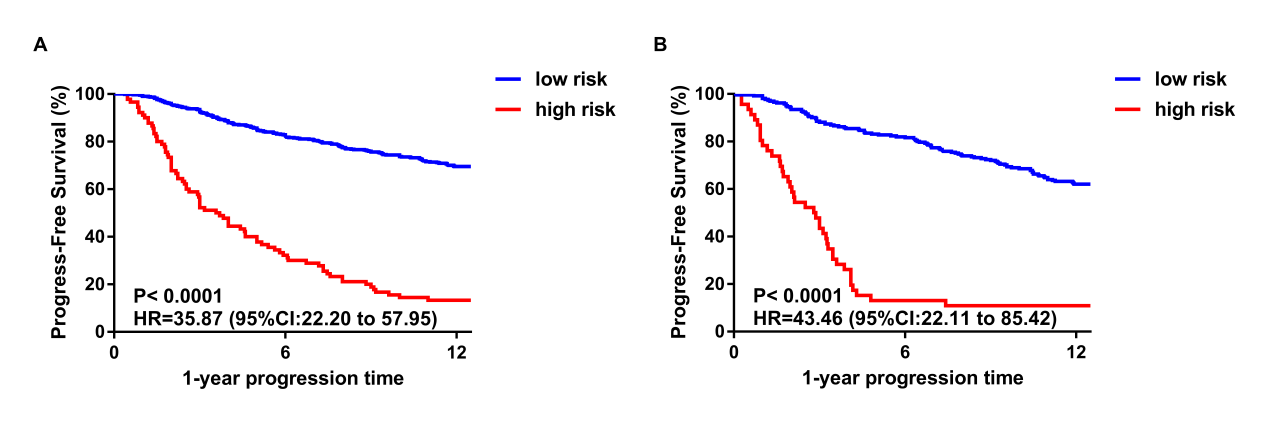


Fig.S1. Risk of progression in hepatocellular carcinoma patients with different cut-off values (high risk, cut-off > 0.4266; low risk, cut-off ≤ 0.4266) in the deriving and validation cohorts. (A) One-year progression-free survival (PFS) rates of the high- and low-risk groups in the deriving cohort. (B) One-year PFS rates of the high- and low-risk groups in the validation cohort. The Kaplan–Meier curve shows a *P* value < 0.0001 via the log-rank test.


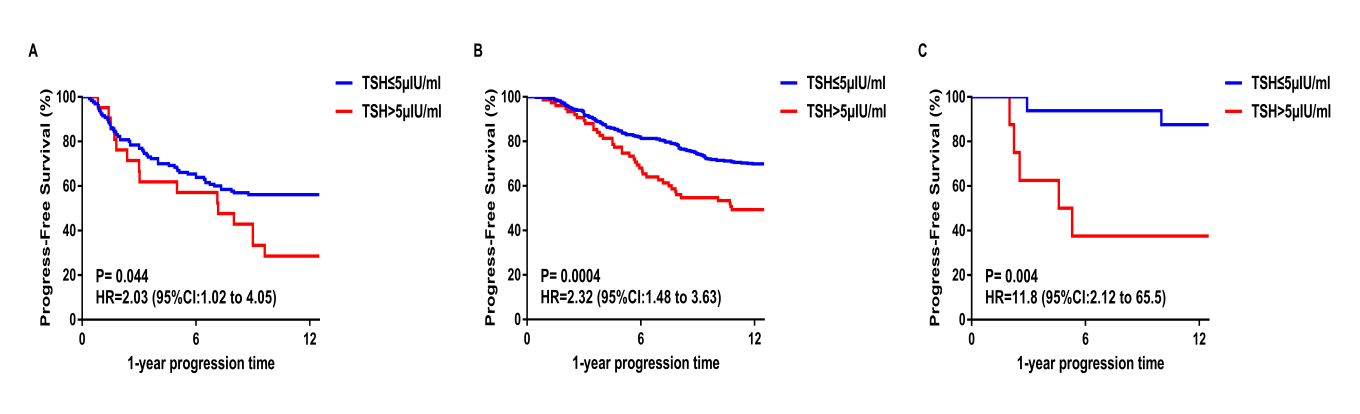


Fig.S2. Risk of progression in hepatocellular carcinoma patients in groups with high and low levels of TSH in the deriving cohorts under different treatments. (A) One-year PFS rates with high and low levels of TSH under conservative treatment. (B) One-year PFS rates with high and low levels of TSH under minimally invasive treatment. (C) One-year PFS rates with high and low levels of TSH under resection treatment. The Kaplan–Meier curve shows a P value < 0.0001 via the log-rank test.
